# Supplementary material for: Carbon cycling in the North American coastal ocean: a synthesis
Source: Copernicus journal article supplement (doi:10.5194/bg-16-1281-2019), 2019-03-27
Supplement: Supplementary file 1 [file bg-16-1281-2019-supplement.pdf]

Supplement of Biogeosciences, 16, 1281–1304, 2019  
<https://doi.org/10.5194/bg-16-1281-2019-supplement>  
© Author(s) 2019. This work is distributed under  
the Creative Commons Attribution 4.0 License.

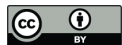

*Supplement of*

## **Carbon cycling in the North American coastal ocean: a synthesis**

**Katja Fennel et al.**

*Correspondence to:* Katja Fennel ([katja.fennel@dal.ca](mailto:katja.fennel@dal.ca))

The copyright of individual parts of the supplement might differ from the CC BY 4.0 License.

## Supplement

| Table S1. Regional Estimates of Net Air-Sea Carbon Dioxide Exchange from Observations and Regional Models <sup>a,b</sup> |                         |                                                |                              |                                                                                       |                                                                     |
|--------------------------------------------------------------------------------------------------------------------------|-------------------------|------------------------------------------------|------------------------------|---------------------------------------------------------------------------------------|---------------------------------------------------------------------|
| Region                                                                                                                   | Area (km <sup>2</sup> ) | Air-Sea Exchange                               |                              | Observation-Based Estimate or Model                                                   | Reference                                                           |
|                                                                                                                          |                         | g C per m <sup>2</sup> per year <sup>a,b</sup> | Tg C per year <sup>a,b</sup> |                                                                                       |                                                                     |
| <b>North American Atlantic Coast (NAAC)</b>                                                                              |                         |                                                |                              |                                                                                       |                                                                     |
| Scotian Shelf                                                                                                            | 2.2 × 10 <sup>5</sup>   | 8.3 ± 6.6                                      | 1.8                          | Combination of <i>in situ</i> and satellite observations (10-year average, 1999–2008) | Shadwick et al. (2010)                                              |
|                                                                                                                          | 1.28 × 10 <sup>5</sup>  | −14 ± 3.2                                      | −1.9                         | Observation-based estimate (reference year, 2004)                                     | Signorini et al. (2013); using Ho et al. (2011) gas transfer param. |
|                                                                                                                          |                         | −5.0 ± 4.3                                     | −0.64                        | Combination of <i>in situ</i> and satellite observations (reference year, 2004)       | Signorini et al. (2013); using Ho et al. (2011) gas transfer param. |
|                                                                                                                          | 1.2 × 10 <sup>5</sup>   | −28 ± 0.72                                     | −3.3                         | Model (2-year average, 2004–2005)                                                     | Fennel and Wilkin (2009)                                            |
| Gulf of Maine (without Georges Bank and Nantucket Shoals)                                                                | 1.28 × 10 <sup>5</sup>  | 0.48 ± 2.6                                     | 0.061                        | Observation-based estimate (reference year, 2004)                                     | Signorini et al. (2013); using Ho et al. (2011) gas transfer param. |
|                                                                                                                          |                         | 0.12 ± 0.96                                    | 0.015                        | Combination of <i>in situ</i> and satellite observations (reference year, 2004)       | Signorini et al. (2013); using Ho et al. (2011) gas transfer param. |
|                                                                                                                          |                         | 4.6 ± 3.1                                      | 0.58                         | Observation-based estimate (5-year mean, 2004–2008)                                   | Vandemark et al. (2011)                                             |
| Georges Bank and Nantucket Shoals                                                                                        | 0.58 × 10 <sup>5</sup>  | −8.5 ± 2.6                                     | −0.49                        | Observation-based estimate (reference year, 2004)                                     | Signorini et al. (2013); using Ho et al. (2011) gas transfer param. |
|                                                                                                                          |                         | −16 ± 2.9                                      | −0.95                        | Combination of <i>in situ</i> and satellite observations (reference year,             | Signorini et al. (2013); using Ho et al. (2011) gas                 |

|                                                        |                    |                 |       |                                                                                 |                                                                     |
|--------------------------------------------------------|--------------------|-----------------|-------|---------------------------------------------------------------------------------|---------------------------------------------------------------------|
|                                                        |                    |                 |       | 2004)                                                                           | transfer param.                                                     |
| Gulf of Maine (with Georges Bank and Nantucket Shoals) | $1.7 \times 10^5$  | $-20 \pm 4.9$   | -3.4  | Model (2-year average, 2004–2005)                                               | Fennel and Wilkin (2009)                                            |
|                                                        | $0.87 \times 10^5$ | $-27 \pm 8.4$   | -1.9  | Model (4-year average, 2004–2007)                                               | Cahill et al. (2016)                                                |
| Mid-Atlantic Bight (MAB)                               | $1.25 \times 10^5$ | $-13 \pm 8.3$   | -1.6  | Observation-based estimate                                                      | DeGrandpre et al. (2002)                                            |
|                                                        |                    | -14             | -1.8  | Model (2004)                                                                    | Fennel et al. (2008)                                                |
|                                                        | $0.93 \times 10^5$ | $-13 \pm 3.2$   | -1.2  | Observation-based estimate (reference year, 2004)                               | Signorini et al. (2013); using Ho et al. (2011) gas transfer param. |
|                                                        |                    | $-21 \pm 2.3$   | -2.0  | Combination of <i>in situ</i> and satellite observations (reference year, 2004) | Signorini et al. (2013); using Ho et al. (2011) gas transfer param. |
|                                                        | $0.86 \times 10^5$ | $-11 \pm 2.6$   | -0.92 | Model (2-year average, 2004–2005)                                               | Fennel and Wilkin (2009)                                            |
|                                                        | $1.15 \times 10^5$ | $-14 \pm 2.4$   | -1.7  | Model (4-year average, 2004–2007)                                               | Cahill et al. (2016)                                                |
| South Atlantic Bight (SAB)                             | $1.02 \times 10^5$ | $-5.8 \pm 2.5$  | -0.59 | Observation-based estimate                                                      | Jiang et al. (2008)                                                 |
|                                                        |                    | $-8.2 \pm 2.9$  | -0.83 | Observation-based estimate (reference year, 2004)                               | Signorini et al. (2013); using Ho et al. (2011) gas transfer param. |
|                                                        |                    | $-8.0 \pm 1.9$  | -0.82 | Combination of <i>in situ</i> and satellite observations (reference year, 2004) | Signorini et al. (2013); using Ho et al. (2011) gas transfer param. |
|                                                        | $0.92 \times 10^5$ | $-6 \pm 2.4$    | -0.55 | Model (4-year average, 2004–2007)                                               | Cahill et al., (2016)                                               |
| <b>Gulf of Mexico (GMx)</b>                            |                    |                 |       |                                                                                 |                                                                     |
| Whole Gulf of Mexico                                   | $15.6 \times 10^5$ | $-2.3 \pm 0.96$ | -3.6  | Observation-based estimate                                                      | Robbins et al. (2014)                                               |
|                                                        |                    | $-8.5 \pm 6.5$  | -13   | Model (7-year average, 2005–2010)                                               | Xue et al. (2016)                                                   |

|                                           |                    |                 |       |                                                              |                         |
|-------------------------------------------|--------------------|-----------------|-------|--------------------------------------------------------------|-------------------------|
| Open Gulf of Mexico                       | $10.1 \times 10^5$ | $-5.8 \pm 0.84$ | -5.8  | Observation-based estimate                                   | Robbins et al. (2014)   |
|                                           |                    | $-12 \pm 5.5$   | -13   | Model (7-year average, 2005–2010)                            | Xue et al. (2016)       |
| West Florida Shelf                        | $1.5 \times 10^5$  | $4.4 \pm 1.3$   | 0.67  | Observation-based estimate                                   | Robbins et al. (2014)   |
|                                           |                    | $4.6 \pm 0.58$  | 0.68  | Model (7-year average, 2005–2010)                            | Xue et al. (2016)       |
| Northern Gulf of Mexico                   | $1.5 \times 10^5$  | $-5.3 \pm 4.4$  | -0.79 | Observation-based estimate                                   | Robbins et al. (2014)   |
|                                           |                    | $-3.8 \pm 8.9$  | -0.58 | Model (7-year average, 2005–2010)                            | Xue et al. (2016)       |
|                                           | unknown            | $-11 \pm 44$    |       | Observation-based estimate                                   | Huang et al. (2015)     |
|                                           | unknown            | $-13 \pm 3.6$   |       | Combination of <i>in situ</i> and satellite observations     | Lohrenz et al. (2018)   |
| Western Gulf of Mexico                    | $0.8 \times 10^5$  | $2.2 \pm 0.6$   | 0.17  | Observation-based estimate                                   | Robbins et al. (2014)   |
|                                           |                    | $4.1 \pm 3.8$   | 0.33  | Model (7-year average, 2005–2010)                            | Xue et al. (2016)       |
| Mexico Shelf                              | $1.8 \times 10^5$  | $-1.1 \pm 0.6$  | -0.19 | Observation-based estimate                                   | Robbins et al. (2014)   |
|                                           |                    | $-2.3 \pm 4.2$  | -0.41 | Model (7-year average, 2005–2010)                            | Xue et al. (2016)       |
| <b>North America Pacific Coast (NAPC)</b> |                    |                 |       |                                                              |                         |
| Gulf of Alaska                            | $3 \times 10^6$    | -11             | -36   | Observations, climatology of 1991–2011, 0 to 400 km offshore | Evans and Mathis (2013) |
| British Columbia coastal ocean            |                    | -35             |       | Observations, 1995–2001                                      | Evans et al. (2012)     |
| British Columbia Vancouver Island shelf   |                    | -6              |       | Model, annual average                                        | Ianson and Allen (2002) |

|                                      |                    |                |               |                                                                                                     |                        |
|--------------------------------------|--------------------|----------------|---------------|-----------------------------------------------------------------------------------------------------|------------------------|
| Oregon Shelf                         |                    | $-3.6 \pm 82$  |               | Observations inshore of 200-m isobath                                                               | Evans et al. (2011)    |
| Oregon Shelf                         |                    | -88            |               | Observations                                                                                        | Hales et al. (2005)    |
| 50° to 22°N                          | $1.76 \times 10^6$ | -7.9           | -14           | Satellite-based prediction of $p\text{CO}_2$ and satellite-based wind speed, within 370 km of coast | Hales et al. (2012)    |
| 35° to 40°N                          |                    |                | 0.6           | Model, 0 to 100 km from coast, 1999–2005                                                            | Fiechter et al. (2014) |
| 40° to 45°N                          |                    |                | -0.4          | Model, 0 to 100 km from the coast, 1999–2005                                                        | Fiechter et al. (2014) |
| 30° to 46°N                          | $1.49 \times 10^6$ | $0.6 \pm 2.4$  | $0.9 \pm 3.6$ | Model, 0 to 800 km from the coast, 12-year simulation with climatological forcing                   | Turi et al. (2014)     |
| <b>North American Arctic (NAA)</b>   |                    |                |               |                                                                                                     |                        |
| Chukchi Sea                          | $2.9 \times 10^5$  | -15            | -4.4          | Observations                                                                                        | Evans et al. (2015b)   |
|                                      | $5.95 \times 10^5$ | $-175 \pm 44$  | $-38 \pm 7$   | Observations                                                                                        | Bates et al. (2006)    |
|                                      | $5.95 \times 10^5$ | -35            | -12.1         | Observations                                                                                        | Gao et al. (2012)      |
|                                      |                    | $-17 \pm 17$   |               | Satellite-based prediction of $p\text{CO}_2$ and satellite-based wind speed                         | Yasunaka et al. (2016) |
| Beaufort Sea (Amundsen Gulf)         |                    | -14            |               | Observations                                                                                        | Shadwick et al. (2011) |
| Beaufort Sea (Cape Bathurst Polynya) |                    | $-44 \pm 28$   |               | Observations                                                                                        | Else et al. (2013)     |
| Beaufort Sea                         | $9.2 \times 10^5$  | -4.4           | -4.0          | Observations                                                                                        | Evans et al. (2015b)   |
| Beaufort Sea                         |                    | $-10 \pm 15$   |               | Observations                                                                                        | Mucci et al. (2010)    |
| Western Arctic Coastal Ocean         | $1.2 \times 10^6$  | $-8.8 \pm 4.8$ | $-11 \pm 5.7$ | Observations                                                                                        | Evans et al. (2015b)   |

|                                                                                                                                                                                    |                    |                |                 |              |                         |
|------------------------------------------------------------------------------------------------------------------------------------------------------------------------------------|--------------------|----------------|-----------------|--------------|-------------------------|
| Hudson Bay                                                                                                                                                                         | $7.32 \times 10^5$ | $-3.2 \pm 1.8$ | $-0.58 \pm 0.3$ | Observations | Else et al. (2008)      |
| Bering Sea                                                                                                                                                                         | $6.94 \times 10^5$ | -9.6           | -6.7            | Observations | Cross et al. (2014a)    |
|                                                                                                                                                                                    |                    | -5.3           | -3.7            | Observations | Takahashi et al. (2009) |
| <sup>a</sup> Positive fluxes indicate a source to the atmosphere.<br><sup>b</sup> C, carbon; CO <sub>2</sub> , carbon dioxide; Tg, teragrams; g, grams; 1 Tg = 10 <sup>12</sup> g. |                    |                |                 |              |                         |
